# Supplementary material for: Different Dietary Sources of Selenium Alleviate Hepatic Lipid Metabolism Disorder of Heat-Stressed Broilers by Relieving Endoplasmic Reticulum Stress
Source: Int J Mol Sci. 2023 Oct 22;24(20):15443. doi: 10.3390/ijms242015443 (PMC10607182; doi:10.3390/ijms242015443)
Supplement: Supplementary file 1 [file ijms-24-15443-s001.zip › Supporting Material.pdf]

**Supplementary Table S1. Composition and nutrient levels of the basal diet (air-dry basis, %)**

| Ingredients          | Phase  |        |
|----------------------|--------|--------|
|                      | 0-3W   | 4-6W   |
| Corn                 | 58.50  | 63.14  |
| Soybean meal         | 33.42  | 31.20  |
| Fish meal            | 1.80   | -      |
| Soybean oil          | 2.35   | 2.00   |
| CaCO <sub>3</sub>    | 1.40   | 1.25   |
| CaHPO <sub>4</sub>   | 1.45   | 1.58   |
| NaCl                 | 0.40   | 0.35   |
| Lys-HCl              | 0.04   | 0.02   |
| DL-Met               | 0.26   | 0.16   |
| L-Thr                | 0.03   | -      |
| Choline chloride     | 0.15   | 0.10   |
| Premix <sup>1</sup>  | 0.20   |        |
| Premix <sup>2</sup>  |        | 0.20   |
| Total                | 100.00 | 100.00 |
| Nutrient composition |        |        |
| ME (MJ/kg)           | 12.27  | 12.33  |
| CP, %                | 20.89  | 19.01  |
| Ca, %                | 1.01   | 0.90   |
| TP, %                | 0.68   | 0.65   |
| AP, %                | 0.41   | 0.38   |
| Lys, %               | 1.15   | 1.00   |
| Met, %               | 0.58   | 0.45   |
| Met+Cys, %           | 0.91   | 0.76   |
| Thr, %               | 0.82   | 0.72   |
| Val, %               | 0.96   | 0.87   |

Trp, %

0.24

0.22

Note: (1) Premix<sup>1</sup> provides the following per kg of the diet: Vitamin A, 8000 IU; Vitamin D<sub>3</sub>, 2000 IU; Vitamin E, 20 IU; Vitamin K<sub>3</sub>, 3.2 mg; Vitamin B<sub>1</sub>, 2 mg; Vitamin B<sub>2</sub>, 6.4 mg; Vitamin B<sub>6</sub>, 4 mg; Vitamin B<sub>12</sub>, 0.2 mg; D-biotin, 1.1 mg; D-pantothenic acid, 12 mg; Nicotinamide, 40 mg; Folic acid, 1 mg; Fe (FeSO<sub>4</sub>·7H<sub>2</sub>O), 100 mg; Cu (CuSO<sub>4</sub>·5H<sub>2</sub>O), 8 mg; Mn (MnSO<sub>4</sub>·H<sub>2</sub>O), 120 mg; Zn (ZnSO<sub>4</sub>·H<sub>2</sub>O), 100 mg; I (KI), 0.7 mg

(2) Premix<sup>2</sup> provides the following per kg of the diet: Vitamin A, 6000 IU; Vitamin D<sub>3</sub>, 1500 IU; Vitamin E, 15 IU; Vitamin K<sub>3</sub>, 2.4 mg; Vitamin B<sub>1</sub>, 1.5 mg; Vitamin B<sub>2</sub>, 4.8 mg; Vitamin B<sub>6</sub>, 3 mg; Vitamin B<sub>12</sub>, 0.15 mg; D-biotin, 0.83 mg; D-pantothenic acid, 9 mg; Nicotinamide, 30 mg; Folic acid, 0.75 mg; Fe (FeSO<sub>4</sub>·7H<sub>2</sub>O), 80 mg; Cu (CuSO<sub>4</sub>·5H<sub>2</sub>O), 8 mg; Mn (MnSO<sub>4</sub>·H<sub>2</sub>O), 100 mg; Zn (ZnSO<sub>4</sub>·H<sub>2</sub>O), 80 mg; I (KI), 0.7 mg

**Supplementary Table S2. Primers used for the Q-PCR**

| Gene                                 | Accession number | Primer pairs (5' to 3' direction)                        |
|--------------------------------------|------------------|----------------------------------------------------------|
| <b>Housekeeping control genes</b>    |                  |                                                          |
| <i>β-Actin</i>                       | AY550069         | F:CCCAAAGCCAACCGTGAGAA<br>R:CCACGTACATGGCTGGGGTG         |
| <b>Lipid metabolic-related genes</b> |                  |                                                          |
| <i>ACACA</i>                         | NM_205505.2      | F:CATGTCTGGTTTGCACCTCGTA<br>R:CCCGCTGCACGTCAACTTT        |
| <i>FASN</i>                          | NM_205155.4      | F:CATTGCACGGAGTCAAAGTATTATC<br>R:TCCAGACGGCAGATTTCAGTAAG |
| <i>SCD</i>                           | NM_204890.2      | F:GCGCTGCTCACATGTTTGG<br>R: TCTCCCGTGGGTTGATGTTC         |
| <i>DGAT2</i>                         | XM_040661934.2   | F:CCGTGAACCGTGACAGCATA<br>R:CCACGATGATGATGGCATTG         |
| <i>MOGAT1</i>                        | XM_015277034.4   | F:GGGAAGCCCCATCCTTGTA<br>R:GCTGCTCAACCTCTTCATTGGT        |
| <i>MOGAT2</i>                        | XM_040661931.2   | F:GGAACAGAGGCAACAGGCTTT<br>R:GAAACCATAAGGAGAGCATCATCAG   |
| <i>SREBP1</i>                        | NM_204126.3      | F:AGTCGGCGATCCTGAGGAA<br>R:TCCTTGAGGGACTTGCTCTTCTG       |
| <i>AMPK</i>                          | NM_001039603.2   | F:CGGCGGCAGATAAACAGAAG<br>R:GCCCAGAATGTAATGCCCAAT        |
| <i>ACSL1</i>                         | NM_001012578.2   | F:CGCACCCCTTCCGACAAATAC<br>R:GGTCGTGAGGGCTGCAAAA         |
| <i>ATGL</i>                          | EU240627.2       | F:ATCACGGTGTCTCCGTTCTCA<br>R:CACGCATGTTTGTGGAAGTGTCT     |
| <i>LIPE</i>                          | XM_040695200.2   | F:GAGGGCTTTGCTGTGTTTGG<br>R:AACCCGAGACACCTCCCAT          |

|                                                |                |                                                             |
|------------------------------------------------|----------------|-------------------------------------------------------------|
| <i>MGLL</i>                                    | NM_001277143.2 | F:ACTCAACCTCGTGCTTCCAAAC<br>R:CGGGAAATTGCACTTGGATCT         |
| <i>CPTI</i>                                    | XM_046918285.1 | F:AAGCAAAAACCAGCCCTGATG<br>R:CCCATGTCTCGGTAGTGAGCAA         |
| <i>ACADL</i>                                   | NM_001006511.3 | F:GGGAGGAGCAGATGTACGTCAA<br>R:GGGCATGACTATATCGGAATGG        |
| <i>ECHS1</i>                                   | NM_001277395.2 | F:ATTGGCTGCGCTGAGAAGATC<br>R:AGCAGCATTGACGGACTCCTT          |
| <i>HADH</i>                                    | NM_001277897.2 | F:GCAAATCACGCAGTTGGCTAA<br>R:GAAGAAATGGAGGCCACCAAA          |
| <i>ACAA2</i>                                   | NM_001006571.3 | F:CATGAGCCAGGCGCCTTAT<br>R:AGTTCTGCTCCTAATCTGGTTCCA         |
| <i>LIPC</i>                                    | XM_046899314.1 | F:CATGTTTCAGGGTTTGCTGGTAGT<br>R:TCAAGGCCTGTAATTCTTCCAATC    |
| <i>ACOX1</i>                                   | NM_001006205.2 | F:GGATTTTTTGCAGGCGGGTAT<br>R:CACACGCTGGTTCACCTGAGT          |
| <i>ECII</i>                                    | NM_001277585.2 | F:CAGGCGTAGCCACGATGAA<br>R:AGTGAGGAAGTCCAGGCTGAGA           |
| <i>DECR2</i>                                   | XM_040683253.2 | F:GGCCGAGGCCTCAAAAAAG<br>R:TTTGCGGCTGCCTGACAT               |
| <b>Endoplasmic reticulum stress biomarkers</b> |                |                                                             |
| <i>PERK</i>                                    | XM_040671515.2 | F:GTGGCTGACTGGAAGGTTATGG<br>R:CAATTGGAGTGCAAACTGGTATTC      |
| <i>eIF2<math>\alpha</math></i>                 | NM_001031323.2 | F:AAACCTGCGCAAGCGTATAGAC<br>R:CCTCATGAAGCTTGGAAGTTGTTAC     |
| <i>ATF4</i>                                    | NM_204880.3    | F:CCACACGTTACCGGCAAAA<br>R:AAATCTCTGCACTCCCTGACA            |
| <i>CHOP</i>                                    | KP064314.1     | F:TGCCGTGCTTAGCAGAATGG<br>R:ATGCTGTACAGTGGTGCTGGAA          |
| <i>IRE1</i>                                    | NM_001285499.2 | F:GGCTGTGTCTTTTATTATGTGGTATCTG<br>R:TGGCTTGTCGCTGTAGAGATTTG |
| <i>XBP-1</i>                                   | NM_001006192.2 | F:CCATTCTGACAACCTCCACAT<br>R:CGAACAGGAGATCAGACTCAGAATC      |
| <i>ATF6</i>                                    | XM_040677276.2 | F:ATGCAGAGCTCCGTTAGTCAGAA<br>R:CTGAGGCTCGTGTCTGTGTAAGG      |
| <i>GRP78</i>                                   | NM_205491.2    | F:CGGACGATGAGGAGAAAAAGG<br>R:GAATAGGTGGTACCGAGGTCGAT        |
| <b>Selenoprotein-encoding genes</b>            |                |                                                             |
| <i>DIO1</i>                                    | NM_001324555.3 | F:TGCGCGCGGTCAAACCT<br>R:TTGCCCTTGGCTATGTGGATT              |
| <i>DIO3</i>                                    | NM_001122648.3 | F:CAGTACAAAACCCGGCTCCA<br>R:TACACTTGGATGACCACCGC            |

|                |                |                                                       |
|----------------|----------------|-------------------------------------------------------|
| <i>GPX1</i>    | NM_001277853.3 | F:ACCATGTTTCGAGAAGTGCGA<br>R:TCTCTCAGGAAGGCGAACAG     |
| <i>GPX2</i>    | NM_001277854.3 | F:GGTCCTCATCGAGAACGTGG<br>R:GCTGGGTGTAATCCCTCACC      |
| <i>GPX3</i>    | NM_001163232.3 | F:CACCATCTACGACTACGGGG<br>R:TCTTCCCCGCGTACTTTCTG      |
| <i>GPX4</i>    | NM_001346449.2 | F:GTGATGCTCCCCCTTCGTCTC<br>R:TACAGGTAGGCGGGCAGAT      |
| <i>MSRB1</i>   | NM_001135558.3 | F:CCCGCAGGAGAATTAAGCGA<br>R:GCTCCCATACACCCTGACTG      |
| <i>SELENOF</i> | NM_001012926.3 | F:AGTACGTGCGTGGTTCTGAC<br>R:GCAATGTTCCCACTGTCGTC      |
| <i>SELENOH</i> | NM_001277865.2 | F:GCCGTAGAGATCAACCCGC<br>R:GACACCTCGAAGCTGTTTCCT      |
| <i>SELENOI</i> | NM_001031528.4 | F:TGCCAGCCTCTGAACTGGAT<br>R:TGCAAACCCAGACATCACCAT     |
| <i>SELENOK</i> | NM_001025441.2 | F:ATAAATCACTGGGGTGGAGGC<br>R:GCTCCTTTGCCTGCTTCTTAC    |
| <i>SELENOM</i> | NM_001277859.2 | F:ACATCCCGCTGTACCATAACCT<br>R:TCTCCTCCCGGGTCATGTC     |
| <i>SELENON</i> | NM_001114972.3 | F:CTGTATGGGGCGAGTGAAGG<br>R:TATCACAGAGGGGACCGAGG      |
| <i>SELENOO</i> | NM_001115017.5 | F:CCCAGCGTTAACCGGAATGA<br>R:TCTTGCCGTCCGCTTTGTTA      |
| <i>SELENOP</i> | NM_001031609.3 | F:CCAAGTGGTCAGCATTACATC<br>R:ATGACGACCACCCTCACGAT     |
| <i>SELENOS</i> | NM_001024734.3 | F:CCGACATGGTGGTAAGAAGACA<br>R:GCTTGTGCATTCAACTCCTCTTG |
| <i>SELENOT</i> | NM_001006557.4 | F:GATCTGCGTCTCCTGAGGTT<br>R:GTAGTTCTCCCCCTCGATGC      |
| <i>SELENOU</i> | NM_001193519.3 | F:GGCTGCTTCGGAAATGTCT<br>R:CTGTTATGGCTGCGCCAAC        |
| <i>SELENOW</i> | NM_001166327.2 | F:TGTGGGTCTGCTTTACGCC<br>R:AAGCTGGAAGGTGCAAAATGAA     |
| <i>SEPHS2</i>  | NM_001366334.2 | F:AGGTTGACGAGTTACAGCGA<br>R:CTCCGGCACTTTACAGCCTC      |
| <i>TXNRD1</i>  | NM_001030762.4 | F:GCCTTACTGTCCGGGGAAAA<br>R:CCTGCACATTCCAAGGCAAC      |
| <i>TXNRD2</i>  | NM_001122691.3 | F:AAAGATGCCCAGCACTACGG<br>R:GCTTGAGCCATCACAGACCA      |
| <i>TXNRD3</i>  | NM_001122777.3 | F:TGACCTCTTCTCCCTGCCTTA<br>R:AAGCACCCACAACCTAGCGTT    |

---
